# Supplementary material for: Adherence to Antipsychotic Therapy: Association With Hospitalization and Medicare Spending Among Part D Enrollees With Schizophrenia
Source: Atypon-hosted journal article supplement (doi:10.1176/appi.ps.201600434), 2017-08-01
Supplement: appi.ps.201600434.ds001.pdf [file appi.ps.201600434.ds001.pdf]

**Online Supplement**

## **Description of Measures**

### Psychiatric and Non-Psychiatric Hospitalizations

Beginning in 2013, CMS began redacting all claims containing information about substance abuse treatment or diagnosis from the Medicare Part A and Part B claims data. Prior research suggests that the redaction has resulted in the deletion of a sizable share of Part A claims for beneficiaries with serious mental illness and Part A expenditures for those with redacted claims are underreported by an average of 57% (1). The CCW Master Beneficiary Services Cost and Use File provides an alternative source of beneficiary-level data on hospital utilization and spending, but these data do not provide the same granular information (e.g., diagnosis codes, procedure codes, dates of service) as the claims and therefore cannot be used to directly distinguish psychiatric from non-psychiatric hospitalizations.

Inpatient hospital utilization and spending data in the Cost and Use file are reported separately for care received in “acute” vs. “other inpatient” settings. “Acute” hospitalizations are defined as admissions to acute care and critical access hospitals, while “other inpatient” hospitalizations consist of admissions to psychiatric hospitals and psychiatric units of acute and critical access hospitals (2). To validate that “acute” hospitalizations corresponded to non-psychiatric admissions and “other inpatient” to psychiatric admissions, we analyzed the Part A claims data for the subset of our cohort with no redacted claims (N=11,702) to determine the overlap between admissions with a psychiatric condition listed as the primary diagnosis in the claims (3) and those designated as “other inpatient” admissions in the Cost and Use file. We determined that 91.5% of “other inpatient” admissions had a psychiatric condition listed as the primary diagnosis, compared to just 12.8% of acute admissions. Based

on this distinction, we classified “other inpatient” hospitalizations as psychiatric and “acute” hospitalizations as non-psychiatric.

### Substance Abuse Disorders

Since all substance abuse information is currently redacted from the Medicare claims data, we created a proxy measure for comorbid substance abuse disorder based on whether or not each beneficiary had evidence of any deleted Part A or Part B claims. This measure was created by comparing spending totals derived from the redacted Parts A and B claims to the unredacted Parts A and B spending totals from the Cost and Use file for each beneficiary (1). Differences between the claims-based spending totals and the Cost and Use were attributed to redacted claims and beneficiaries with non-matching totals were classified as having a diagnosis of substance abuse disorder.

### **References**

1. Roberto P, Brandt N, Onukwugha E, et al: Redaction of substance abuse claims in Medicare research files affects spending outcomes for nearly one in five beneficiaries with serious mental illness. *Health Services Research* (Epub ahead of print, July 24, 2016)
2. Chronic Conditions Data Warehouse: Medicare Administrative Data User Guide Version 3.1. Baltimore, Buccaneer Computer Systems and Services, Inc. Available at: [https://www.ccwdata.org/cs/groups/public/documents/document/ccw\\_userguide.pdf](https://www.ccwdata.org/cs/groups/public/documents/document/ccw_userguide.pdf). Accessed August 14, 2016
3. Weiden PJ, Kozma C, Grogg A, et al: Partial compliance and risk of rehospitalization among California Medicaid patients with schizophrenia. *Psychiatric Services* 55:886-891, 2004

**Appendix Table 1: Characteristics of Medicare Part D Enrollees with Schizophrenia<sup>a</sup>**

| Variable                                          | N                 | %      |
|---------------------------------------------------|-------------------|--------|
| Total sample                                      | 13,861            | 100    |
| Adherence category                                |                   |        |
| PDC < .70                                         | 13.3              | 1,813  |
| .70 ≤ PDC < .80                                   | 5.5               | 748    |
| .80 ≤ PDC < .90                                   | 10.4              | 1,424  |
| PDC ≥ .90                                         | 70.9              | 9,696  |
| Age                                               |                   |        |
| <65                                               | 80.1              | 10,958 |
| 65-74                                             | 10.8              | 1,475  |
| 75-84                                             | 6.3               | 857    |
| ≥85                                               | 2.9               | 391    |
| Male                                              | 58.4              | 7,993  |
| Race                                              |                   |        |
| White                                             | 67.9              | 9,292  |
| Black                                             | 22.8              | 3,124  |
| Hispanic                                          | 4.3               | 589    |
| Other                                             | 4.9               | 676    |
| LIS recipient                                     | 89.0              | 12,178 |
| CCI score                                         |                   |        |
| 0                                                 | 63.4              | 8,679  |
| 1-2                                               | 27.5              | 3,767  |
| 3+                                                | 9.0               | 1,235  |
| Depot antipsychotic use                           | 4.0               | 547    |
| Comorbid condition                                |                   |        |
| Anxiety disorder                                  | 21.1              | 2,880  |
| Depression                                        | 27.3              | 3,739  |
| Personality disorder                              | 4.0               | 545    |
| Substance abuse disorder                          | 15.8              | 2,159  |
| Asthma                                            | 6.3               | 866    |
| Cancer                                            | 2.7               | 366    |
| CHF                                               | 8.7               | 1,190  |
| COPD                                              | 12.4              | 1,690  |
| Diabetes                                          | 28.7              | 3,923  |
| Heart disease                                     | 14.0              | 1,917  |
| Hyperlipidemia                                    | 37.4              | 5,110  |
| Hypertension                                      | 42.4              | 5,795  |
| Any non-psychiatric hospitalization               | 15.2              | 2,072  |
| Any psychiatric hospitalization                   | 8.5               | 1,158  |
| Non-psychiatric hospital expenditures (mean ± SD) | \$2,060 ± \$7,661 |        |

Psychiatric hospital expenditures (mean  $\pm$  SD) \$1,373  $\pm$  \$6,831

---

<sup>a</sup> PDC, proportion of days covered; LIS, low-income subsidy; CCI, Charlson Comorbidity Index; CHF, congestive heart failure; COPD, chronic obstructive pulmonary disease; SD, standard deviation.

**Appendix Table 2: Characteristics of Medicare Part D Enrollees with Schizophrenia by Adherence Category<sup>a</sup>**

| Variable                   | PDC < 0.70<br>(N=1,813) |      | .70 ≤ PDC < .80<br>(N=748) |      | .80 ≤ PDC < .90<br>(N=1,424) |      | PDC ≥ 0.90<br>(N=9,696) |      | χ <sup>2b</sup> | p     |
|----------------------------|-------------------------|------|----------------------------|------|------------------------------|------|-------------------------|------|-----------------|-------|
|                            | N                       | %    | N                          | %    | N                            | %    | N                       | %    |                 |       |
| Male                       | 1,032                   | 56.9 | 409                        | 54.7 | 832                          | 58.4 | 5,720                   | 59.0 | 7.30            | .063  |
| Race                       |                         |      |                            |      |                              |      |                         |      |                 |       |
| White                      | 938                     | 51.7 | 451                        | 60.3 | 901                          | 63.3 | 7,002                   | 72.2 | 334.08          | <.001 |
| Black                      | 686                     | 37.8 | 230                        | 30.8 | 369                          | 25.9 | 1,839                   | 19.0 | 348.18          | <.001 |
| Hispanic                   | 106                     | 5.9  | 31                         | 4.1  | 67                           | 4.7  | 385                     | 4.0  | 13.69           | .003  |
| Other                      | 83                      | 4.6  | 36                         | 4.8  | 87                           | 6.1  | 470                     | 4.9  | 4.85            | .183  |
| Age (mean±SD) <sup>c</sup> | 52.5±15.8               |      | 52.3±16.2                  |      | 52.5±15.2                    |      | 53.0±14.2               |      |                 | .227  |
| LIS recipient              | 1,518                   | 83.7 | 632                        | 84.5 | 1,234                        | 86.7 | 8,794                   | 90.7 | 103.61          | <.001 |
| CCI score                  |                         |      |                            |      |                              |      |                         |      |                 |       |
| 0                          | 1,159                   | 63.9 | 495                        | 66.2 | 902                          | 63.3 | 6,123                   | 63.2 | 2.96            | .398  |
| 1-2                        | 469                     | 25.9 | 181                        | 24.2 | 380                          | 26.7 | 2,737                   | 28.2 | 9.55            | .023  |
| 3+                         | 185                     | 10.2 | 72                         | 9.6  | 142                          | 10.0 | 836                     | 8.6  | 6.86            | .076  |
| Depot antipsychotic use    | 48                      | 2.7  | 28                         | 3.7  | 67                           | 4.7  | 404                     | 4.2  | 11.31           | .010  |
| Comorbid condition         |                         |      |                            |      |                              |      |                         |      |                 |       |
| Substance abuse            | 444                     | 24.5 | 170                        | 22.7 | 256                          | 17.9 | 1,289                   | 13.3 | 180.90          | <.001 |
| Anxiety disorder           | 452                     | 24.9 | 193                        | 25.8 | 313                          | 22.0 | 1,922                   | 19.8 | 36.13           | <.001 |
| Depression                 | 603                     | 33.3 | 216                        | 28.9 | 436                          | 30.6 | 2,484                   | 25.6 | 55.04           | <.001 |
| Personality disorder       | 83                      | 4.6  | 38                         | 5.1  | 66                           | 4.6  | 358                     | 3.7  | 7.76            | .051  |
| Asthma                     | 133                     | 7.3  | 38                         | 5.1  | 77                           | 5.4  | 618                     | 6.4  | 7.14            | .068  |
| Cancer                     | 70                      | 3.9  | 15                         | 2.0  | 42                           | 2.9  | 304                     | 3.1  | 6.41            | .093  |
| CHF                        | 183                     | 10.1 | 61                         | 8.2  | 122                          | 8.6  | 824                     | 8.5  | 5.24            | .155  |
| COPD                       | 241                     | 13.3 | 90                         | 12.0 | 164                          | 11.5 | 1,195                   | 12.3 | 2.47            | .480  |
| Diabetes                   | 472                     | 26.0 | 184                        | 24.6 | 403                          | 28.3 | 2,864                   | 29.5 | 15.88           | .001  |
| Heart disease              | 308                     | 17.0 | 124                        | 16.6 | 197                          | 13.8 | 1,288                   | 13.3 | 21.72           | <.001 |
| Hyperlipidemia             | 555                     | 30.6 | 237                        | 31.7 | 498                          | 35.0 | 3,820                   | 39.4 | 66.25           | <.001 |
| Hypertension               | 796                     | 43.9 | 304                        | 40.6 | 604                          | 42.4 | 4,091                   | 42.2 | 2.79            | .043  |

<sup>a</sup> PDC, proportion of days covered; LIS, low-income subsidy; CCI, Charlson Comorbidity Index; CHF, congestive heart failure. COPD, chronic obstructive pulmonary disease.

<sup>b</sup> df = 3

<sup>c</sup> F=3.03, df=3,13677

**Appendix Table 3: Share of Medicare Part D Enrollees with Schizophrenia with Any Psychiatric or Non-Psychiatric Related Hospitalization and Average Hospital Expenditures by Adherence Category**

| Variable                                                     | PDC < 0.70 <sup>a</sup><br>(N=1,813) |      | .70 ≤ PDC < .80 <sup>a</sup><br>(N=748) |      | .80 ≤ PDC < .90 <sup>a</sup><br>(N=1,424) |      | PDC ≥ 0.90 <sup>a</sup><br>(N=9,696) |      | p     |
|--------------------------------------------------------------|--------------------------------------|------|-----------------------------------------|------|-------------------------------------------|------|--------------------------------------|------|-------|
|                                                              | N                                    | %    | N                                       | %    | N                                         | %    | N                                    | %    |       |
| Any non-psychiatric hospitalization <sup>b</sup>             | 342                                  | 18.9 | 112                                     | 15.0 | 220.0                                     | 15.5 | 1,398                                | 14.4 | <.001 |
| Any psychiatric hospitalization <sup>c</sup>                 | 260                                  | 14.3 | 84                                      | 11.2 | 138                                       | 9.7  | 676                                  | 7.0  | <.001 |
| Non-psychiatric hospital expenditures (mean±SD) <sup>d</sup> | \$2,580±\$8,722                      |      | \$2,216±\$8,597                         |      | \$2,272±\$8,049                           |      | \$1,919±\$7,302                      |      | .005  |
| Psychiatric hospital expenditures (mean±SD) <sup>e</sup>     | \$2,513±\$9,450                      |      | \$1,923±\$7,973                         |      | \$1,529±\$6,915                           |      | \$1,095±\$6,073                      |      | <.001 |

<sup>a</sup> PDC, proportion of days covered

<sup>b</sup>  $\chi^2 = 23.61$ , df=3

<sup>c</sup>  $\chi^2 = 118.83$ , df=3

<sup>d</sup> F=4.34, df=3,13677

<sup>e</sup> F=24.19, df=3,13677
